# Supplementary material
Source: PubMed Central journal article supplement (PMC7361120)
Supplement: mmc1.pdf [file mmc1.pdf]

**Appendix**  
**Vaccine Efficacy Needed for a COVID-19 Coronavirus Vaccine to**  
**Prevent or Stop an Epidemic as the Sole Intervention**  
**Bartsch et al.**

## **DATA SOURCES**

Appendix Table 1 shows key model input parameters, values, distribution type, and sources. All costs, clinical probabilities, and durations were age-specific when available and come from scientific literature or nationally representative data sources. The probability of an infected individual being a given age was based on the age-distribution of cases in the U.S. and age-specific COVID-19 data are specific to the U.S. context as of March 16, 2020.<sup>1</sup> We report all costs in 2020 values, converting all past and future values to net present value using a 3% discount rate. We parameterized seeding SARS-CoV-2-infected persons into the population for a given  $R_0$  such that simulated cases reflected case data reported as of March 24, 2020.<sup>1</sup>

## **MODEL PARAMETERIZATION**

We parameterized the number of individuals starting in the  $I_a$  state and  $I_s$  state on day one (i.e., coronavirus seed) SARS-CoV2-infected persons into the population for a given  $R_0$  such that simulated cases reflected case data reported as of March 24, 2020.<sup>1</sup> This date was the last date for which data was available at the time of model calibration. When the asymptomatic individuals were half as infectious as symptomatic individuals, for an  $R_0$  of 2.5, this was equivalent to 400 symptomatic cases and 87 asymptomatic cases; for an  $R_0$  of 3.5 this was 50 symptomatic cases and 11 asymptomatic cases. When the probability of asymptomatic infection was 35% and asymptomatic individuals were as infectious as symptomatic individuals (i.e., relative infectiousness of asymptomatic infection 100%),<sup>2</sup> for an  $R_0$  of 2.5, this was equivalent to 250 symptomatic cases and 134 asymptomatic cases; for an  $R_0$  of 3.5 this was 26 symptomatic cases and 14 asymptomatic cases. All of these parameterizations have a ratio of symptomatic to asymptomatic persons based on the probability of having symptoms.

**Appendix**  
**Vaccine Efficacy Needed for a COVID-19 Coronavirus Vaccine to**  
**Prevent or Stop an Epidemic as the Sole Intervention**  
**Bartsch et al.**

**Appendix Figure 1.** Model structure A) transmission and B) clinical pathway of COVID-19 cases.

A.

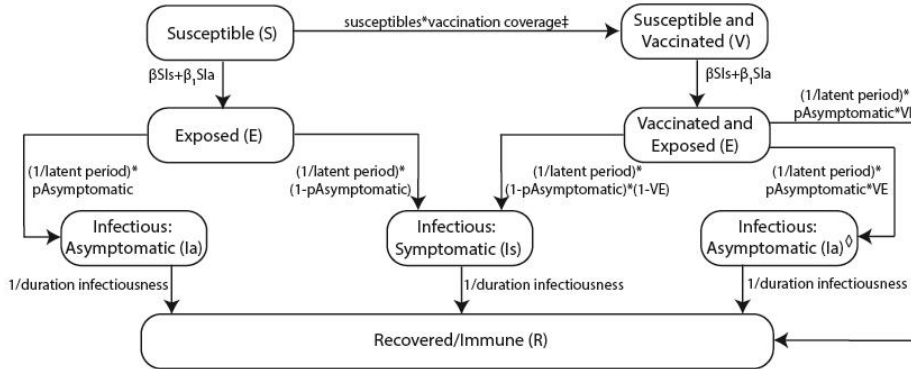

VE = vaccine efficacy; it is turned on/off in either or both of these places in the model, depending on scenario

$\beta_s$  = symptomatic beta

$\beta_a$  = asymptomatic beta

$\phi$  Have reduced viral shedding, depending on scenario

#Any individual in the population could be vaccinated, however the vaccine had no impact on those already infected and/or exposed

B.

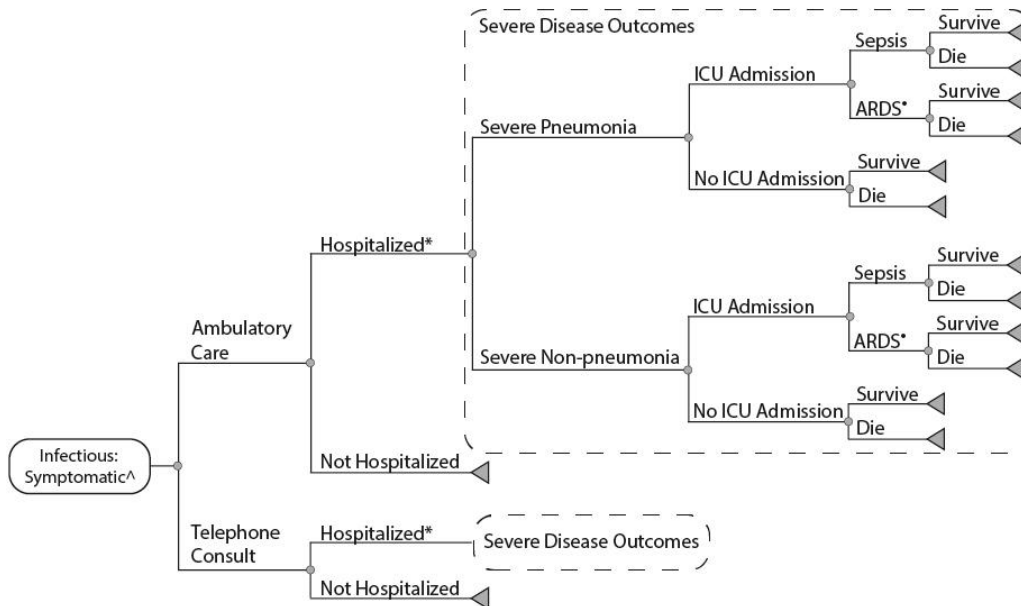

^Person starts with mild infection

\*Person progresses to severe disease requiring hospitalization

\*ARDS= acute respiratory distress syndrome, with or without sepsis

**Appendix**  
**Vaccine Efficacy Needed for a COVID-19 Coronavirus Vaccine to**  
**Prevent or Stop an Epidemic as the Sole Intervention**  
**Bartsch et al.**

**Appendix Table 1.** Model Parameter Inputs, Values, and Sources

| Parameter                                                                         | Distribution type | Mean or median | SE or range                 | Source                     |
|-----------------------------------------------------------------------------------|-------------------|----------------|-----------------------------|----------------------------|
| <b>SARS-CoV-2 transmission</b>                                                    |                   |                |                             |                            |
| Latent period (days)                                                              | Triangular        | 5.2            | 4.1–7.0                     | 3                          |
| Infectious period (days)                                                          | Uniform           |                | 3–14                        | 4–7                        |
| <b>Costs (2020 US\$)</b>                                                          |                   |                |                             |                            |
| Annual wages (all occupations)                                                    | Beta pert         | 40,993         | 21,950–104,403 <sup>a</sup> | 8                          |
| Ambulatory care visit                                                             | Uniform           |                | 110.43–148.33               | 9                          |
| <b>Over the counter medications, daily</b>                                        |                   |                |                             |                            |
| 0–12 years old <sup>b</sup>                                                       | Gamma             | 3.87           | 2.10                        | 10                         |
| ≥13 years old <sup>c</sup>                                                        | Gamma             | 0.46           | 0.17                        | 10                         |
| <b>Hospitalization for pneumonia<sup>d</sup></b>                                  |                   |                |                             |                            |
| 0–17 years old                                                                    | Gamma             | 12,502.30      | 1,508.04                    | 11                         |
| 18–44 years old                                                                   | Gamma             | 10,627.15      | 1,045.06                    | 11                         |
| 45–64 years old                                                                   | Gamma             | 13,718.14      | 1,238.76                    | 11                         |
| 65–84 years old                                                                   | Gamma             | 12,264.39      | 478.40                      | 11                         |
| ≥85 years old                                                                     | Gamma             | 10,982.73      | 518.29                      | 11                         |
| Hospitalization for severe non-pneumonia (all ages) <sup>e</sup>                  | Gamma             | 6,886.53       | 1,182.99                    | 11                         |
| <b>Hospitalization for sepsis<sup>f</sup></b>                                     |                   |                |                             |                            |
| 0–17 years old <sup>g</sup>                                                       | Gamma             | 22,694.30      | 1,861.33                    | 11                         |
| 18–44 years old                                                                   | Gamma             | 43,778.39      | 5,382.40                    | 11                         |
| 45–64 years old                                                                   | Gamma             | 38,734.24      | 2,725.10                    | 11                         |
| 65–84 years old                                                                   | Gamma             | 30,308.29      | 1,367.91                    | 11                         |
| ≥85 years old                                                                     | Gamma             | 22,694.30      | 1,861.33                    | 11                         |
| <b>Hospitalization for acute respiratory distress syndrome (ARDS)<sup>h</sup></b> |                   |                |                             |                            |
| 0–17 years old                                                                    | Gamma             | 42,350.58      | 4,198.97                    | 11                         |
| 18–44 years old                                                                   | Gamma             | 26,210.96      | 1,558.61                    | 11                         |
| 45–64 years old                                                                   | Gamma             | 19,863.98      | 453.92                      | 11                         |
| 65–84 years old                                                                   | Gamma             | 18,718.55      | 335.69                      | 11                         |
| ≥85 years old                                                                     | Gamma             | 16,559.75      | 754.12                      | 11                         |
| <b>Probabilities</b>                                                              |                   |                |                             |                            |
| Asymptomatic infection                                                            | Beta              | 0.179          | 0.155 - 0.202               | 12                         |
| Relative infectiousness of asymptomatic infection                                 | Point estimate    | 0.5            |                             | Assumption <sup>2,13</sup> |
| Missing work/school                                                               | Point estimate    | 1.0            |                             | Assumption                 |
| Ambulatory care                                                                   |                   |                |                             |                            |

**Appendix**  
**Vaccine Efficacy Needed for a COVID-19 Coronavirus Vaccine to**  
**Prevent or Stop an Epidemic as the Sole Intervention**  
**Bartsch et al.**

|                                                    |                |        |                          |            |
|----------------------------------------------------|----------------|--------|--------------------------|------------|
| 0–4 years old                                      | Beta           | 0.455  | 0.098                    | 14         |
| 5–17 years old                                     | Beta           | 0.318  | 0.061                    | 14         |
| 18–64 years old                                    | Beta           | 0.313  | 0.014                    | 14         |
| ≥65 years old                                      | Beta           | 0.62   | 0.027                    | 14         |
| Probability of hospitalization, given infection    |                |        |                          |            |
| 0–19 years old                                     | Point estimate | 0.016  |                          | 1          |
| 20–44 years old                                    | Point estimate | 0.143  |                          | 1          |
| 45–64 years old                                    | Point estimate | 0.208  |                          | 1          |
| 65–84 years old                                    | Point estimate | 0.292  |                          | 1          |
| ≥85 years old                                      | Point estimate | 0.313  |                          | 1          |
| Probability of intensive care unit (ICU) admission |                |        |                          |            |
| 0–19 years old                                     | Point estimate | 0.0    |                          | 1          |
| 20–44 years old                                    | Point estimate | 0.1399 |                          | 1          |
| 45–64 years old                                    | Point estimate | 0.2422 |                          | 1          |
| 65–84 years old                                    | Point estimate | 0.3048 |                          | 1          |
| ≥85 years old                                      | Point estimate | 0.2013 |                          | 1          |
| Probability of mortality                           |                |        |                          |            |
| 0–19 years old                                     | Point estimate | 0.0    |                          | 1          |
| 20–44 years old                                    | Point estimate | 0.007  |                          | 1          |
| 45–64 years old                                    | Point estimate | 0.0456 |                          | 1          |
| 65–84 years old                                    | Point estimate | 0.1109 |                          | 1          |
| ≥85 years old                                      | Point estimate | 0.3323 |                          | 1          |
| Pneumonia, given hospitalization                   | Beta           | 0.79   | 0.711–0.869 <sup>i</sup> | 15         |
| ARDS, requiring ventilator use                     | Beta           | 0.73   | 0.1697                   | 16,17      |
| Age-group, given infection <sup>j</sup>            |                |        |                          |            |
| 0–19 years old                                     | Point estimate | 0.0502 |                          | 1          |
| 20–44 years old                                    | Point estimate | 0.2879 |                          | 1          |
| 45–64 years old                                    | Point estimate | 0.3503 |                          | 1          |
| 65–84 years old                                    | Point estimate | 0.2528 |                          | 1          |
| ≥85 years old                                      | Point estimate | 0.0588 |                          | 1          |
| Durations (days)                                   |                |        |                          |            |
| Ambulatory care                                    | Point estimate | 0.5    |                          | Assumption |
| Duration of symptoms with mild illness             | Triangular     | 7      | 3–17                     | 6,18,19    |
| Duration of symptoms prior to hospital admission   | Triangular     | 7      | 3–9 <sup>j</sup>         | 16,20      |
| Hospitalization for pneumonia <sup>d</sup>         |                |        |                          |            |
| 0–17 years old                                     | Gamma          | 4.7    | 0.4                      | 11         |
| 18–44 years old                                    | Gamma          | 4.3    | 0.4                      | 11         |
| 45–64 years old                                    | Gamma          | 5.1    | 0.2                      | 11         |
| 65–84 years old                                    | Gamma          | 5.5    | 0.2                      | 11         |

**Appendix**  
**Vaccine Efficacy Needed for a COVID-19 Coronavirus Vaccine to**  
**Prevent or Stop an Epidemic as the Sole Intervention**  
**Bartsch et al.**

|                                                                             |       |      |      |               |
|-----------------------------------------------------------------------------|-------|------|------|---------------|
| ≥85 years old                                                               | Gamma | 5.0  | 0.2  | <sup>11</sup> |
| Hospitalization for severe non-pneumonia (all ages) <sup>e</sup>            | Gamma | 3.1  | 0.5  | <sup>11</sup> |
| Hospitalization for sepsis <sup>f</sup>                                     |       |      |      |               |
| 0–17 years old <sup>g</sup>                                                 | Gamma | 7.3  | 0.5  | <sup>11</sup> |
| 18–44 years old                                                             | Gamma | 11.2 | 1.3  | <sup>11</sup> |
| 45–64 years old                                                             | Gamma | 10.7 | 0.5  | <sup>11</sup> |
| 65–84 years old                                                             | Gamma | 8.8  | 0.4  | <sup>11</sup> |
| ≥85 years old                                                               | Gamma | 7.3  | 0.5  | <sup>11</sup> |
| Hospitalization for acute respiratory distress syndrome (ARDS) <sup>h</sup> |       |      |      |               |
| 0–17 years old                                                              | Gamma | 9.5  | 0.75 | <sup>11</sup> |
| 18–44 years old                                                             | Gamma | 8.8  | 0.5  | <sup>11</sup> |
| 45–64 years old                                                             | Gamma | 7.1  | 0.1  | <sup>11</sup> |
| 65–84 years old                                                             | Gamma | 7.0  | 0.1  | <sup>11</sup> |
| ≥85 years old                                                               | Gamma | 6.1  | 0.3  | <sup>11</sup> |

<sup>a</sup>Values are 95% CI.

<sup>b</sup>Assumes 5 to 10 mg/kg orally every 6 to 8 hours as needed OR 10 to 15 mg/kg orally every 4 to 6 hours as needed.

<sup>c</sup>Assumes 200 mg orally every 4 to 6 hours as needed.

<sup>d</sup>Uses ICD-10-CM code #J13 Pneumonia due to *Streptococcus pneumoniae*.

<sup>e</sup>Uses ICD-10-CM code #J11.89 Influenza due to unidentified influenza virus with other manifestations.

<sup>f</sup>Uses ICD-10-CM code #R65.21 Severe sepsis with septic shock.

<sup>g</sup>Data for age-group unavailable and uses lowest values of all age-groups as a proxy.

<sup>h</sup>Uses ICD-10-CM code #J96.22 Acute and chronic respiratory failure with hypercapnia for 18 years and older and ICD-10-CM code #J96.20 Acute and chronic respiratory failure, unspecified whether with hypoxia or hypercapnia for 0 to 17-year olds.

<sup>i</sup>Values account for the age-specific probability of infection.

<sup>j</sup>Values are 10%–90%.

**Appendix**  
**Vaccine Efficacy Needed for a COVID-19 Coronavirus Vaccine to**  
**Prevent or Stop an Epidemic as the Sole Intervention**  
**Bartsch et al.**

**Appendix Table 2.** Number of Clinical Outcomes, Resource Use, and Costs Due to COVID-19 During the Course of an Epidemic When Vaccination Occurs When 0% of the Population Has Been Exposed to SARS-CoV-2 With a Vaccine That Prevents Infection, Varying With Vaccine Efficacy

| Scenario                              | Total SARS-CoV-2 cases<br>(in millions) | Symptomatic cases<br>(in millions) | Hospitalized cases<br>(in millions) | Number of patients ventilated<br>(in millions) | Deaths<br>(in thousands)      | Total beds days (in millions) | Ventilated days<br>(in millions) | Direct medical costs<br>(in billions) | Productivity losses<br>(in billions) |
|---------------------------------------|-----------------------------------------|------------------------------------|-------------------------------------|------------------------------------------------|-------------------------------|-------------------------------|----------------------------------|---------------------------------------|--------------------------------------|
|                                       | Median<br>(95% CI)                      | Median<br>(95% CI)                 | Median<br>(95% CI)                  | Median<br>(95% CI)                             | Median<br>(95% CI)            | Median<br>(95% CI)            | Median<br>(95% CI)               | Median<br>(95% CI)                    | Median<br>(95% CI)                   |
| <b>R<sub>0</sub> of 2.5</b>           |                                         |                                    |                                     |                                                |                               |                               |                                  |                                       |                                      |
| No vaccine                            | 282.5<br>(280.7, 284.3)                 | 232.1<br>(223.9, 240.0)            | 48.1<br>(46.4, 49.8)                | 8.5<br>(6.5, 9.7)                              | 4,160.9<br>(4,014.2, 4,302.0) | 267.2<br>(251.7, 282.6)       | 68.0<br>(51.8, 77.9)             | 883.5<br>(808.5, 980.8)               | 2,796.4<br>(1,661.8, 4,515.5)        |
| 60% vaccine efficacy,<br>75% coverage | 43.0<br>(7.1, 53.8)                     | 37.7<br>(6.2, 48.5)                | 7.8<br>(1.3, 10.0)                  | 1.3<br>(0.2, 1.9)                              | 675.9<br>(111.3, 869.0)       | 43.3<br>(7.2, 56.1)           | 10.5<br>(1.7, 15.1)              | 137.7<br>(22.5, 183.9)                | 386.6<br>(62.5, 771.4)               |
| 70% vaccine efficacy,<br>75% coverage | 0.10<br>(0.04, 0.72)                    | 0.09<br>(0.03, 0.65)               | 0.02<br>(0.01, 0.1)                 | 0.003<br>(0.001, 0.02)                         | 1.63<br>(0.58, 11.6)          | 0.10<br>(0.04, 0.75)          | 0.03<br>(0.01, 0.19)             | 0.33<br>(0.12, 2.34)                  | 1.05<br>(0.32, 8.61)                 |
| 80% vaccine efficacy,<br>60% coverage | 27.1<br>(3.5, 45.8)                     | 22.6<br>(2.9, 39.4)                | 4.7<br>(0.6, 8.2)                   | 0.8<br>(0.1, 1.5)                              | 404.3<br>(51.3, 705.5)        | 25.9<br>(3.3, 45.8)           | 6.5<br>(0.8, 11.9)               | 81.2<br>(10.5, 147.5)                 | 239.0<br>(28.8, 604.0)               |
| <b>R<sub>0</sub> of 3.5</b>           |                                         |                                    |                                     |                                                |                               |                               |                                  |                                       |                                      |
| No vaccine                            | 312.9<br>(311.9, 314.0)                 | 257.1<br>(248.7, 264.8)            | 53.3<br>(51.6, 54.9)                | 9.5<br>(7.2, 10.7)                             | 4,608.3<br>(4,458.0, 4,747.6) | 296.0<br>(281.4, 312.1)       | 76.2<br>(57.6, 85.7)             | 978.9<br>(896.4, 1,082.3)             | 3,141.3<br>(1,871.3, 5,059.2)        |
| 80% vaccine efficacy,<br>75% coverage | 39.3<br>(5.6, 46.2)                     | 33.3<br>(4.7, 40.5)                | 6.9<br>(1.0, 8.4)                   | 1.1<br>(0.2, 1.6)                              | 596.7<br>(84.5, 726.9)        | 38.2<br>(5.4, 46.9)           | 9.1<br>(1.4, 12.7)               | 119.7<br>(17.2, 154.3)                | 329.1<br>(54.3, 652.7)               |
| 80% vaccine efficacy,<br>60% coverage | 110.9<br>(105.2, 119.3)                 | 91.6<br>(86.9, 96.1)               | 19.0<br>(18.0, 19.9)                | 3.3<br>(2.6, 3.8)                              | 1,642.8<br>(1,558.7, 1,723.1) | 105.5<br>(98.2, 112.8)        | 26.7<br>(20.3, 31.0)             | 345.4<br>(311.2, 386.9)               | 1,076.7<br>(644.0, 1,795.9)          |

**Appendix**  
**Vaccine Efficacy Needed for a COVID-19 Coronavirus Vaccine to**  
**Prevent or Stop an Epidemic as the Sole Intervention**  
**Bartsch et al.**

## APPENDIX REFERENCES

1. Severe Outcomes Among Patients with Coronavirus Disease 2019 (COVID-19) — United States, February 12–March 16, 2020. *MMWR Morb Mortal Wkly Rep.* 2020;69(12):343–346. <https://doi.org/10.15585/mmwr.mm6912e2>.
2. CDC. COVID-19 Pandemic Planning Scenarios. <https://www.cdc.gov/coronavirus/2019-ncov/hcp/planning-scenarios.html>. Published May 20, 2020. Accessed June 1, 2020.
3. Li Q, Guan X, Wu P, et al. Early transmission dynamics in Wuhan, China, of novel coronavirus–infected pneumonia. *N Engl J Med.* 2020;382(13):1199–1207. <https://doi.org/10.1056/nejmoa2001316>.
4. Ling Y, Xu S, Lin Y, et al. The persistence and clearance of viral RNA in 2019 novel coronavirus disease survivors. *Chin Med J (Engl).* 2020;133(9):1039–1043. <https://doi.org/10.1097/CM9.0000000000000774>.
5. Wolfel R, Corman VM, Guggemos W, et al. Virological assessment of hospitalized patients with COVID-2019. *Nature.* 2020;581(7809):465–469. <https://doi.org/10.1038/s41586-020-2196-x>.
6. Chang, Mo G, Yuan X, et al. Time kinetics of viral clearance and resolution of symptoms in novel coronavirus infection. *Am J Respir Crit Care Med.* 2020;201(9):1150–1152. <https://doi.org/10.1164/rccm.202003-0524le>.
7. To KK, Tsang OT, Leung WS, et al. Temporal profiles of viral load in posterior oropharyngeal saliva samples and serum antibody responses during infection by SARS-CoV-2: an observational cohort study. *Lancet Infect Dis.* 2020;20(5):565–574. [https://doi.org/10.1016/S1473-3099\(20\)30196-1](https://doi.org/10.1016/S1473-3099(20)30196-1).
8. Bureau of Labor Statistics. Occupational employment statistics: May 2018 national occupational employment and wage estimates, United States. [https://www.bls.gov/oes/2018/may/oes\\_nat.htm](https://www.bls.gov/oes/2018/may/oes_nat.htm). Published April 2, 2019. Accessed October 9, 2019.
9. Centers for Medicare & Medicaid Services. Physician Fee Schedule. <https://www.cms.gov/apps/physician-fee-schedule/>. Published 2020. Accessed April 13, 2020.
10. Walgreens Co. Price listing. <https://www.walgreens.com>. Published 2020. Accessed March 17, 2020.
11. HHS. HCUP facts and figures: statistics on hospital-based care in the United States. <https://hcupnet.ahrq.gov/#setup>. Published 2016. Accessed March 17, 2020.
12. Mizumoto K, Kagaya K, Zarebski A, Chowell G. Estimating the asymptomatic proportion of coronavirus disease 2019 (COVID-19) cases on board the Diamond Princess cruise ship, Yokohama, Japan, 2020. *Euro Surveill.* 2020;25(10):2000180. <https://doi.org/10.2807/1560-7917.es.2020.25.10.2000180>.
13. Ferguson N, Laydon D, Nedjati Gilani G, et al. Report 9: Impact of non-pharmaceutical interventions (NPIs) to reduce COVID-19 mortality and healthcare demand. Imperial College London. <https://www.imperial.ac.uk/media/imperial-college/medicine/sph/ide/gida-fellowships/Imperial-College-COVID19-NPI-modelling-16-03-2020.pdf>. Published March 16, 2020. Accessed July 1, 2020.
14. Molinari N-AM, Ortega-Sanchez IR, Messonnier ML, et al. The annual impact of seasonal influenza in the US: measuring disease burden and costs. *Vaccine.* 2007;25(27):5086–5096. <https://doi.org/10.1016/j.vaccine.2007.03.046>.

**Appendix**  
**Vaccine Efficacy Needed for a COVID-19 Coronavirus Vaccine to**  
**Prevent or Stop an Epidemic as the Sole Intervention**  
**Bartsch et al.**

15. Guan WJ, Ni ZY, Hu Y, et al. Clinical characteristics of coronavirus disease 2019 in China. *N Engl J Med*. 2020;382(18):1708–1720. <https://doi.org/10.1056/nejmoa2002032>.
16. Wang D, Hu B, Hu C, et al. Clinical characteristics of 138 hospitalized patients with 2019 novel coronavirus-infected pneumonia in Wuhan, China. *JAMA*. 2020;323(11):1061–1069. <https://doi.org/10.1001/jama.2020.1585>.
17. Huang C, Wang Y, Li X, et al. Clinical features of patients infected with 2019 novel coronavirus in Wuhan, China. *Lancet*. 2020;395(10223):497–506. [https://doi.org/10.1016/s0140-6736\(20\)30183-5](https://doi.org/10.1016/s0140-6736(20)30183-5).
18. Arashiro T, Furukawa K, Nakamura A. COVID-19 in 2 persons with mild upper respiratory symptoms on a cruise ship, Japan. *Emerg Infect Dis*. 2020;26(6):1345–1348. <https://doi.org/10.3201/eid2606.200452>.
19. Duszynski T. What does it mean to ‘recover from coronavirus’? Here’s what you need to know. *Science Alert. Health*. April 11, 2020. <https://www.sciencealert.com/this-is-what-it-means-to-recover-from-corona-and-what-you-can-do-after>. Accessed July 1, 2020.
20. Garg S, Kim L, Whitaker M, et al. Hospitalization rates and characteristics of patients hospitalized with laboratory-confirmed coronavirus disease 2019 — COVID-NET, 14 states, March 1–30, 2020. *MMWR Morb Mortal Wkly Rep*. 2020;69(15):458–464. <https://doi.org/10.15585/mmwr.mm6915e3>.
